# Supplementary material
Source: publisher figshare collection journal article supplement (https://frontiersin.figshare.com/ndownloader/files/13825031)
Supplement: Supplementary file [file 13825031]

## *Supplementary Material*

### **Long interleukin-22 binding protein isoform-1 is an intracellular activator of the unfolded protein response**

**Paloma Gómez-Fernández<sup>1,2</sup>, Andoni Urtasun<sup>1,2</sup>, Adrienne W. Paton<sup>3</sup>, James C. Paton<sup>3</sup>, Francisco Borrego<sup>4,5,6</sup>, Devin Dersh<sup>7,8</sup>, Yair Argon<sup>7</sup>, Iraide Alloza<sup>1,2</sup> and Koen Vandebroek<sup>1,2,6\*</sup>**

\* **Correspondence:** Koen Vandebroek [k.vandebroek@ikerbasque.org](mailto:k.vandebroek@ikerbasque.org)

#### **1 Supplementary Data**

**Supplementary Data 1.** CD14<sup>+</sup>/CD16<sup>+</sup> monocyte purification and cytokine measurements

**Supplementary Data 2.** Information on protein identification

#### **2 Supplementary Figures and Tables**

##### **2.1 Supplementary Figures**

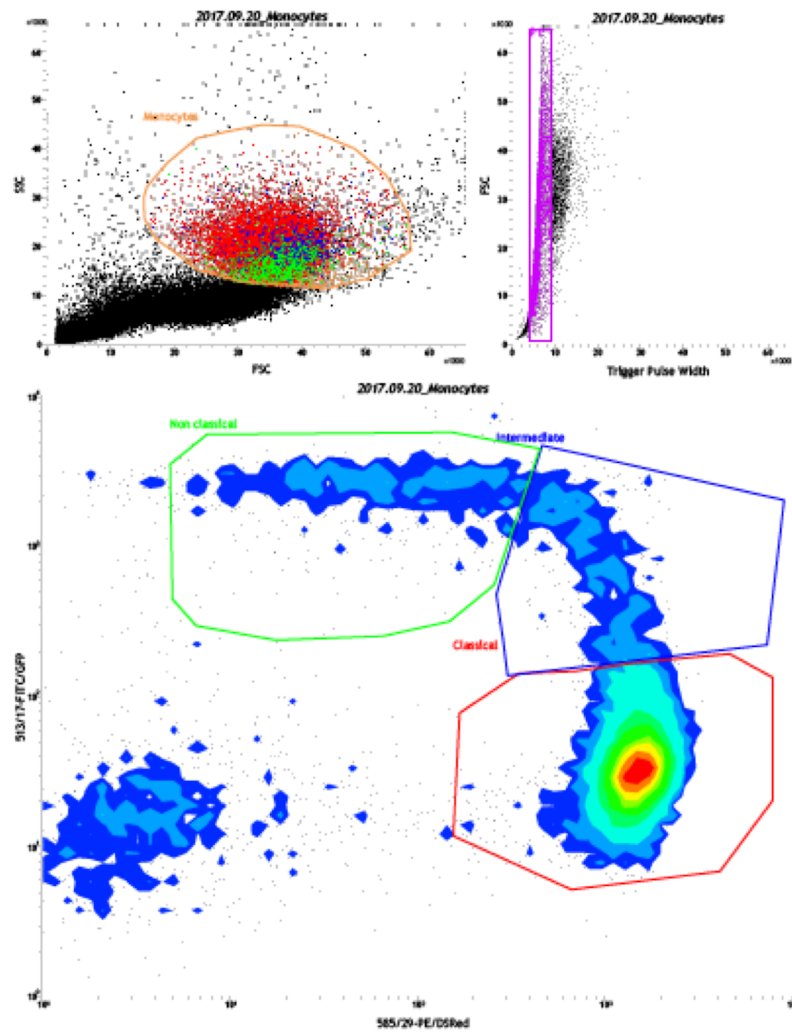

**Supplementary Figure 1.** Sorting strategy for monocyte subpopulation sorting. Sorting strategy consisted in a size-complexity discrimination of monocytes (orange circle, up left), selection of events with one cell width (purple, up right) and finally monocyte subpopulations discrimination based on CD14 (PE) and CD16 (FITC) labelling (bottom, density plot)

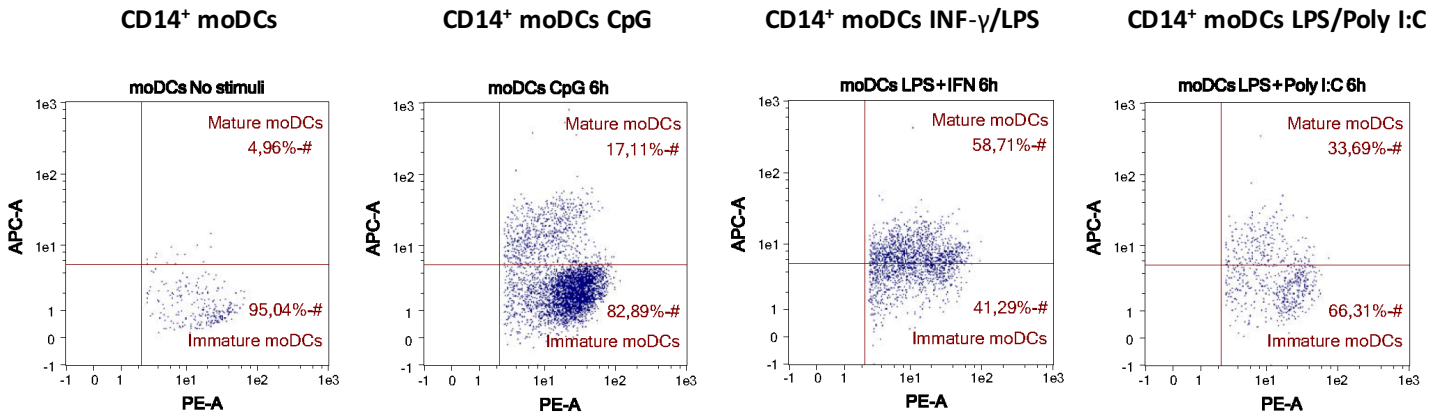

**Supplementary Figure 2.** Flow cytometric analysis of moDCs using Mo-DC Differentiation Inspector following use of different maturation stimuli. *CD83=APC*, *CD209=PE*.

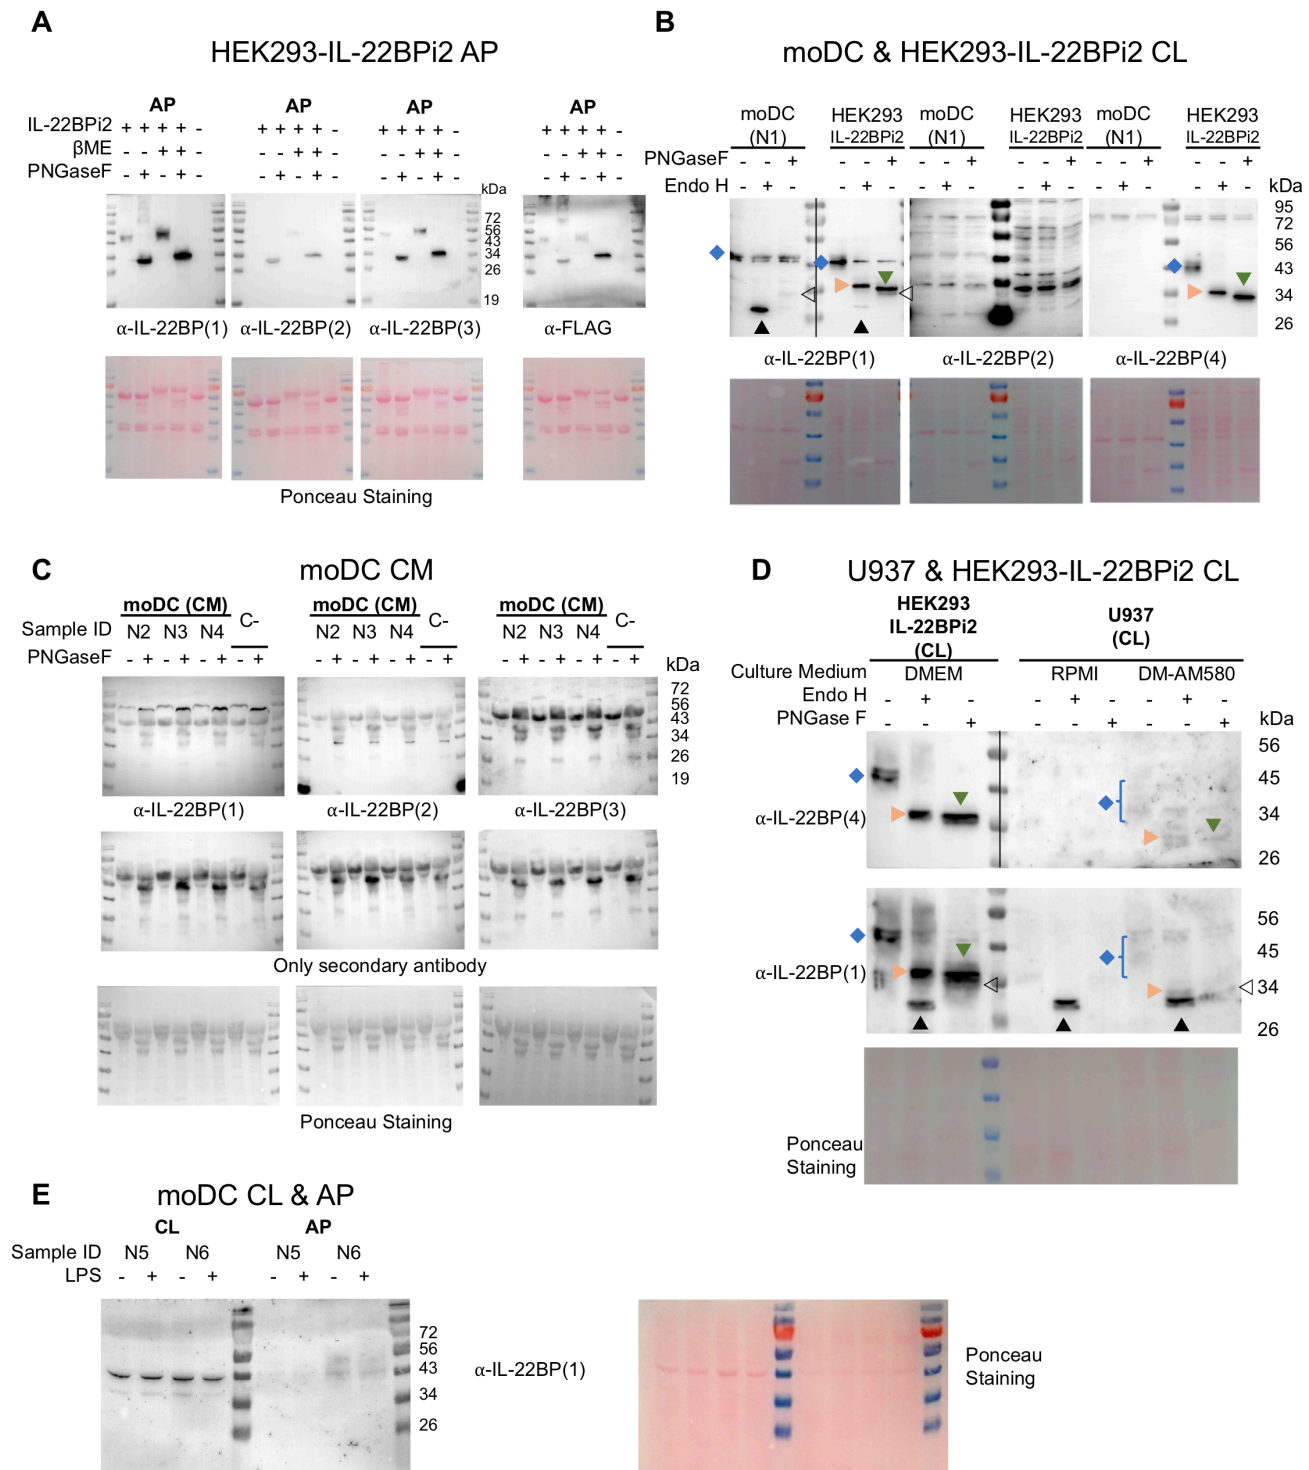

**Supplementary Figure 3.** IL-22BPi2 detection with different antibodies. **(A)** HEK293 cells were transiently transfected with the expression vector encoding IL-22BPi2 or left untransfected. 300 µl

of conditioned medium (CM) were acetone precipitated (AP), treated with or without PNGase F and immunoblotted for IL-22BP with different antibodies (S1 Table) under non- or reducing conditions ( $\beta$ ME). Ponceau staining indicates equal loading volumes. PNGase F treatment enhanced detection of the secreted form of IL-22BPi2 by all four antibodies. **(B)** moDCs were harvested after 6 days in DM supplemented with AM580. HEK293 cells were transfected as in (A). Cell lysates (CL) were treated with or without PNGase F or Endo H and immunoblotted for detection of IL-22BP with different antibodies. Ponceau staining indicates equal loading quantity. Glycosylated IL-22BPi2, Endo H and PNGase F products are indicated, respectively, with a blue diamond, orange arrowhead or green inverted triangle; black triangles and open arrowheads indicate the reactivity of the antibody  $\alpha$ -IL-22BP (1) for Endo H and PNGase F enzymes, respectively. Vertical line separates parts of the same membrane under different exposures (left part, long; right part, short). A 43-kD band reactive with  $\alpha$ -IL-22BP antibody (1) in moDCs was partially deglycosylated. **(C)** moDC CM from three different healthy controls (N3, N4 and N5) was collected after 6 days in DM, 20  $\mu$ l of each or culture media without cell contact (C-) were subjected to PNGaseF treatment to enhance detectability of secreted IL-22BP proteins (see A) and immunoblotted for detection of IL-22BP with three different  $\alpha$ -IL-22BP antibodies. Before primary antibody incubation, membranes were immunoblotted with the corresponding secondary-HRP conjugated antibody. Notice the high antibody reactivity with the serum that is present in the CM. Ponceau staining indicate equal loading volumes. We did not detect specific proteins in the CM of moDC reactive with any of the three antibodies used. **(D)** U937 were harvested after 6 days of culture in RPMI or DM supplemented with AM580. HEK293 cells were transfected as in (A). Cell lysates were treated with or without PNGase F or Endo H and immunoblotted for detection of IL-22BP with different antibodies. Ponceau staining indicates equal loading quantity. Glycosylated IL-22BPi2, Endo H and PNGase F products are indicated, respectively, with a blue diamond, orange arrowhead or green inverted triangle; black triangle and open arrowheads indicate the reactivity of the antibody  $\alpha$ -IL-22BP (1) for Endo H and PNGase F enzymes respectively. Anti-IL-22BP immunoreactive bands have higher Mr in HEK293 compared to U927 cells due to added myc-FLAG affinity tag. Vertical line separates parts of the same membrane under different exposures (left part, short; right part, long). **(E)** moDCs and CM were harvested after 6 days in DM during the last 20 hours of which cells were treated with LPS or left untreated. 300  $\mu$ l of CM was AP-ed and immunoblotted for detection of IL-22BP under reducing or non-reducing conditions. Ponceau staining showed equal quantities and volumes loaded.

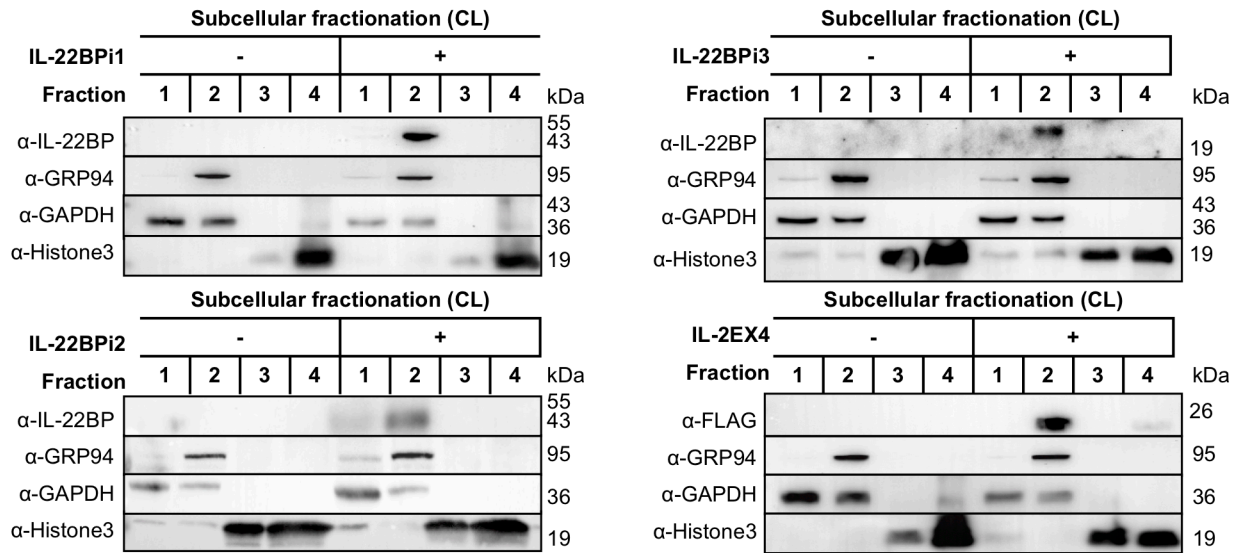

**Supplementary Figure 4.** IL-22BPi1, BPi2, BPi3 and IL-2EX4 are located in the membranous organelles fraction. HEK293 cells were transiently transfected with the indicated expression plasmids, and after 24 hours, cells were collected and fractionated following Holden and Horton's protocol (1). Equal amounts of protein per fraction were immunoblotted for GRP94, GAPDH, IL-22BP (Ab 4), FLAG and Histone3. Fractions 1, 2, 3 and 4 represent cytosol, membranous organelles, nucleus and insoluble fractions respectively.



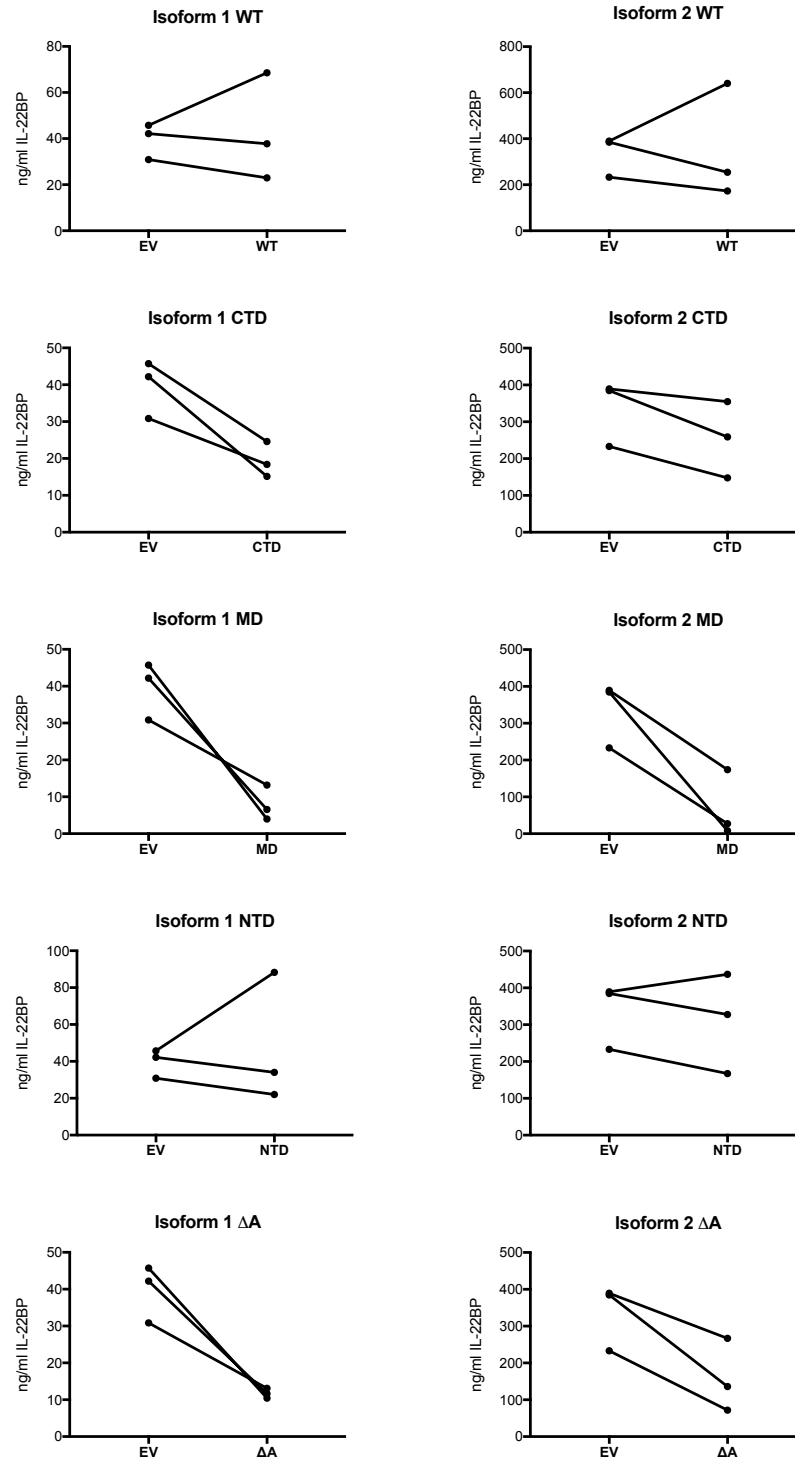

**Supplementary Figure 6.** Expression vectors for IL-22BP isoform-1 and -2 were individually transfected into HEK293 cells together with either GRP94 wild-type (WT) or GRP94 mutant vectors (CTD, MD, NTD, or deltaA) or empty vector (EV). 24 h after transfection, secreted IL-22BP was analyzed by ELISA.



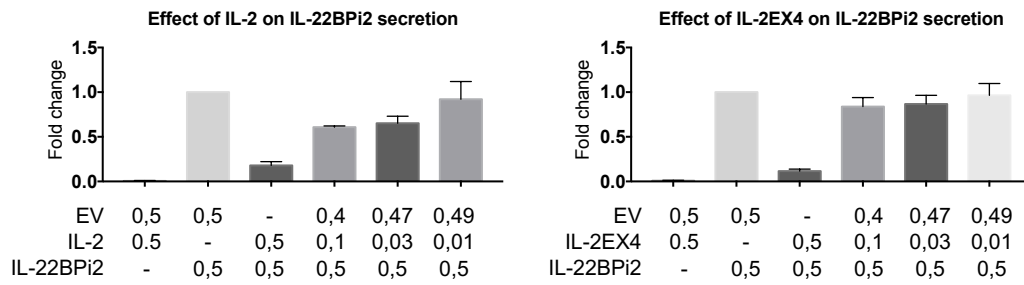

**Supplementary Figure 7.** IL-22BPi2 secretion is not increased in presence of IL-2 or IL-2EX4. HEK293 cells were co-expressed with different ratios of EV:IL-2:IL-22BPi2 or EV:IL-2EX4:IL-22BPi2 expression plasmids, after 48 hours, IL-22BP secretion was measured by ELISA in conditioned medium. Error bars represent  $\pm$  SEM of three independent experiments.

**Disorder prediction for IL-22BPi1 (RaptorX)**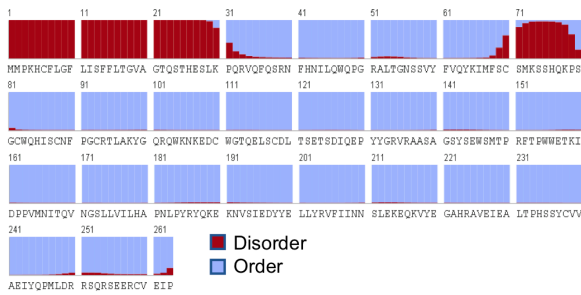**Intrinsic disorder profile of IL-22BPi1 (DISOPRED)**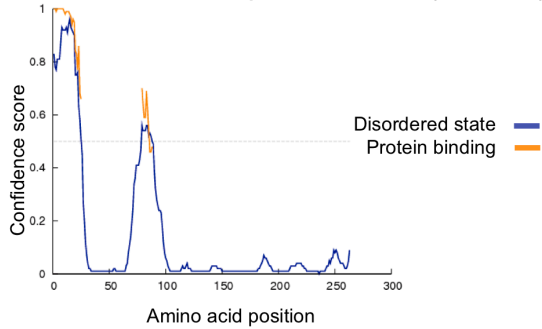**Disorder prediction for IL-22BPi2 (Raptor X)**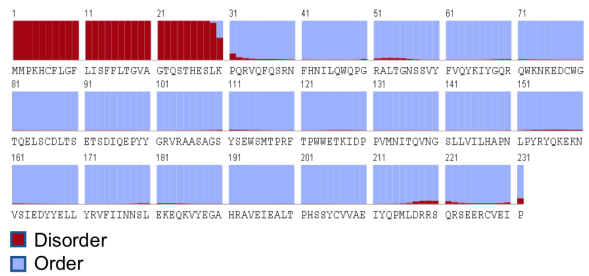**Intrinsic disorder profile of IL-22BPi2 (DISOPRED)**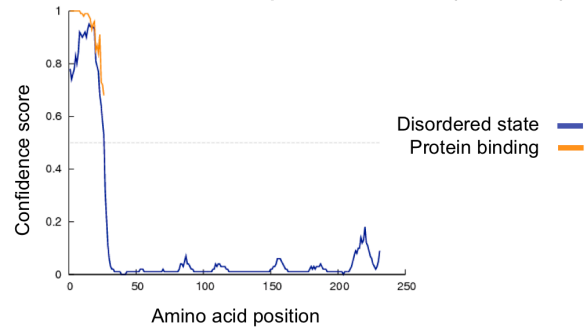**Disorder prediction for IL-22BPi3 (Raptor X)**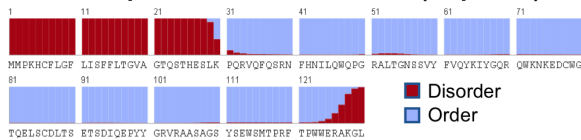**Intrinsic disorder profile of IL-22BPi3 (DISOPRED)**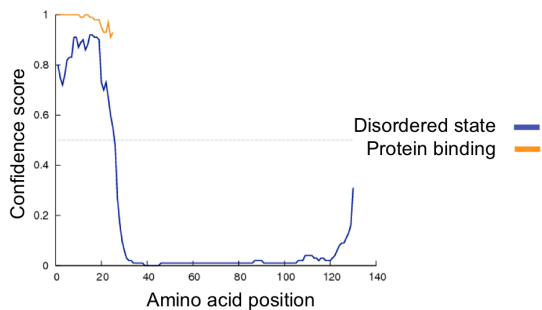

**Supplementary Figure 8.** IL-22BPi1 is predicted to contain an intrinsic disordered region corresponding to the alternatively spliced exon coding sequence. Two different computational programs for protein disorder prediction were run for the three IL-22BP mature isoforms, i.e. RaptorX (2) and DISOPRED3 (3).

## 2.2 Supplementary Tables

**Supplementary Table 1.** List of IL-22BP antibodies used throughout this study.

### **IL-22BP antibodies used throughout this study**

| <b>Nr</b> | <b>Host</b> | <b>Company</b> | <b>Cat Nr</b>         |
|-----------|-------------|----------------|-----------------------|
| (1)       | Mouse       | Proteintech    | 66190                 |
| (2)       | Rabbit      | Abcam          | ab133965              |
| (2)       | Mouse       | Abcam          | ab90937               |
| (4)       | Goat        | R&D            | AF1087 and<br>BAF1087 |

**Supplementary Table 2.** Primers used for gene expression and cloning.**PRIMERS**

- Designed SYBR Green primers (IDT)

| Isoform specific | Transcripts               | Sequence (5'→3')          | Figure                               |
|------------------|---------------------------|---------------------------|--------------------------------------|
| FW IL22RA2       | 3 <i>IL22RA2</i> variants | TGCTTTCTAGGCTTCCTCATC     | 1A (Gel)                             |
| RV IL22RA2       |                           | TGAGCCCCCTTCATAAACCTT     |                                      |
| FW 1q*           | <i>IL22RA2v1</i>          | ATTTTGCAATGGCAGCCTG       | 1A (Gel)<br>1A, 8B, 8C and 8E (qPCR) |
| RV 1q*           |                           | GCCTGGGAAGTTACAAGAAATG    |                                      |
| FW 2&3q*         | <i>IL22RA2v2</i>          | GTGCAGTACAAAATATATGGACAGA |                                      |
| RV 2q*           |                           | GAGGATCTATTTTGTTCACACC    |                                      |
| RV 3q*           | <i>IL22RA2v3</i>          | CTTTTGCTCTTCCCACCAG       |                                      |

- Cloning

|                                 |                                        |                                              |
|---------------------------------|----------------------------------------|----------------------------------------------|
| FW IL22RA2v1 cloning Fragment 1 | GCCGCGATCGCCATGATGCCTAAACATTGCTTTCTAG  | 1A, 1D, 2A, 7A, 8B, 8C, 8D, 8E and 8F (qPCR) |
| RV IL22RA2v1 cloning Fragment 1 | GCGTCATGCTCCATTCTGAG                   |                                              |
| FW IL22RA2v1 cloning Fragment 2 | CATGTTCTCATGCAGCATGAAAAGCTCTCACCAGA    |                                              |
| RV IL22RA2v1 cloning Fragment 2 | CGTACGCGTTGGAATTTCCACACATCTCTCTTCACTTC |                                              |
| FW IL2 cloning                  | CATCGCTCTAGAAATGTTCTCATGCAGCATG        |                                              |
| RV IL2 cloning                  | GACGGCTCTAGACATTTAGCCAATGTTCTGCA       |                                              |
| FW GAPDH                        | CACATCGCTCAGACACCAT                    | 7C (Gel)                                     |
| RV GAPDH                        | GCAACAATATCCACTTTACCAGAG               |                                              |
| FW XBP1                         | TTACGAGAGAAAACCTCATGGCC                |                                              |
| RV XBP1                         | GGGTCCAAGTTGTCCAGAATGC                 |                                              |

- Pre-designed SYBR Green primers (IDT)

| Gene                                          | Official name | Reference          |                                          |
|-----------------------------------------------|---------------|--------------------|------------------------------------------|
| <i>HPRT1</i>                                  | HPRT1         | Hs.PT.58v.45621572 | 8G                                       |
| <i>IL22RA2</i> BC (3 <i>IL22RA2</i> variants) | IL22RA2       | Hs.PT.58.40811     | 1D, 2A, 8B, 8C, 8D, 8E, 8F and 8G (qPCR) |
| <i>HERP</i>                                   | HERPUD1       | Hs.PT.58.21409911  | 7A and 8G (qPCR)                         |
| <i>CHOP</i>                                   | DDIT3         | Hs.PT.58.3400360   |                                          |
| <i>GRP78</i>                                  | HSPA5         | Hs.PT.58.22715160  |                                          |
| <i>ERP44</i>                                  | ERP44         | Hs.PT.58.4529248   |                                          |
| <i>PPIB</i>                                   | PPIB          | Hs.PT.58.40291667  |                                          |

Pre-designed SYBR Green primers (Qiagen)

| Gene          | Official name | Reference  |                  |
|---------------|---------------|------------|------------------|
| <i>GRP94</i>  | HSP90         | QT01848273 | 7A and 8G (qPCR) |
| <i>ERDJ3</i>  | DNAJB11       | QT00042560 |                  |
| <i>GRP170</i> | HYOU1         | QT00046214 |                  |

TaqMan primers (Thermo)

| Gene                                       | Official name | Reference     |                  |
|--------------------------------------------|---------------|---------------|------------------|
| <i>IL22RA2</i> (3 <i>IL22RA2</i> variants) | IL22RA2       | Hs00364814_m1 | 1B and 1C (qPCR) |
| <i>IL12B</i>                               | IL12B         | Hs01011519_m1 |                  |
| <i>IL6</i>                                 | IL6           | Hs00174131_m1 |                  |
| <i>ACTB</i>                                | ACTB          | Hs99999903_m1 |                  |

\*Taken from ref. #12: Lim C, Hong M, Savan R. Human IL-22 binding protein isoforms act as a rheostat for IL-22 signaling. Sci Signal. 2016 Sep 27;9(447):ra95-ra95. Available from: <http://stke.sciencemag.org/cgi/doi/10.1126/scisignal.aad9887>

### 3 References

1. Holden P, Horton WA. Crude subcellular fractionation of cultured mammalian cell lines. BMC Res Notes [Internet]. 2009;2(1):243. Available from: <http://bmcrsnotes.biomedcentral.com/articles/10.1186/1756-0500-2-243>
2. Wang S, Li W, Liu S, Xu J. RaptorX-Property: a web server for protein structure property prediction. Nucleic Acids Res. 2016;44(W1):W430–5.
3. Jones DT, Cozzetto D. DISOPRED3: precise disordered region predictions with annotated protein-binding activity. Bioinformatics [Internet]. 2015 Mar 15;31(6):857–63. Available from: <https://academic.oup.com/bioinformatics/article-lookup/doi/10.1093/bioinformatics/btu744>
